# Supplementary figures and images for: p62 is Negatively Implicated in the TRAF6-BECN1 Signaling Axis for Autophagy Activation and Cancer Progression by Toll-Like Receptor 4 (TLR4)
Source: MDPI journal article supplement (doi:10.3390/cells9051142), 2020-05-06

**A**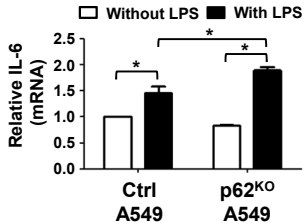**B**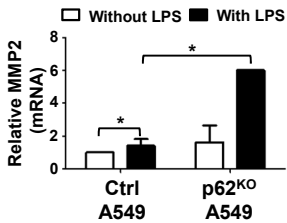**C**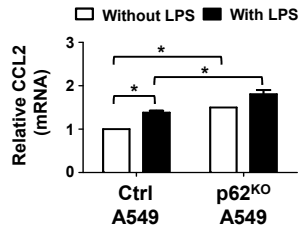

***Supplemental Figure S3***

Supplement: s1 [file s1]

**A**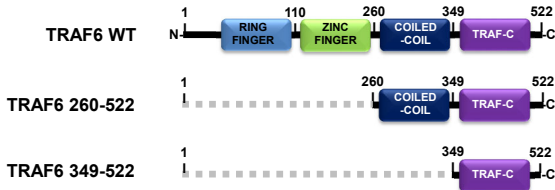**B**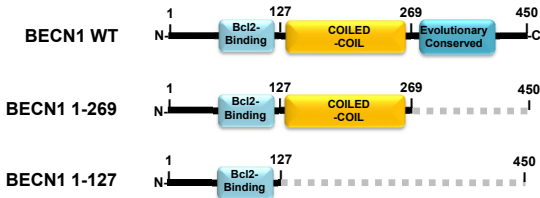

***Supplemental Figure S1***

Supplement: s1 [file s1]

**A**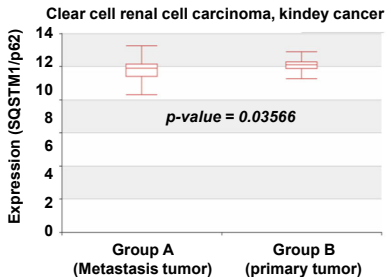**B**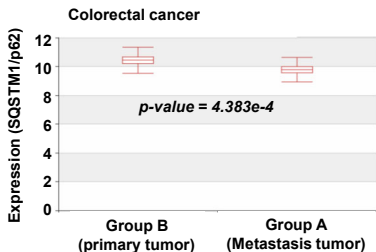

***Supplemental Figure S5***

Supplement: s1 [file s1]

|            |   |   |   |   |
|------------|---|---|---|---|
| Mock       | + | + | + | - |
| Myc-BECN1  | - | + | - | + |
| Flag-TRAF6 | - | - | + | + |

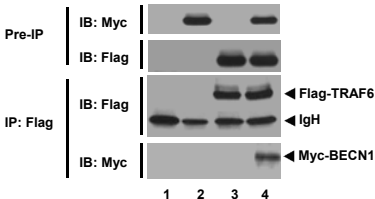

***Supplemental Figure S2***

Supplement: s1 [file s1]

**A**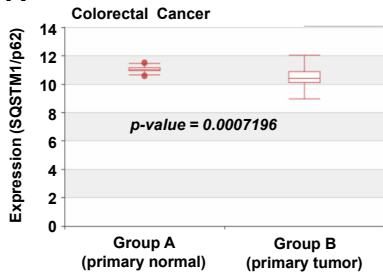**C**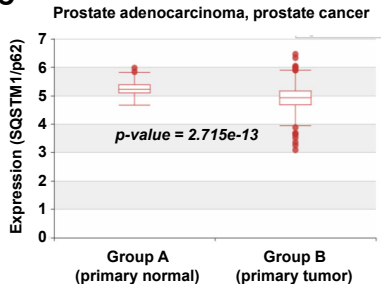**B**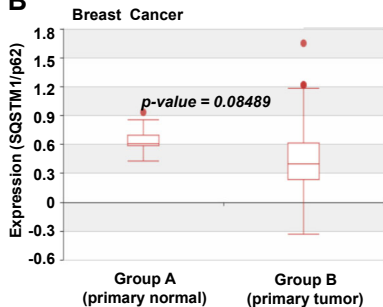**D**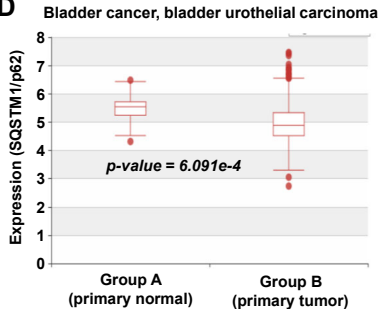

Supplement: s1 [file s1]
